# Supplementary material for: Fixation can change the appearance of phase separation in living cells
Source: eLife. 2022 Nov 29;11:e79903. doi: 10.7554/eLife.79903 (PMC9817179; doi:10.7554/eLife.79903)
Supplement: Figure 1—figure supplement 3—source data 1. [file elife-79903-fig1-figsupp3-data1.xlsx]

## Sheet: 0% PFA
After Bound Fraction	After STD	After Num Puncta	Before Bound fraction	Before STD	Before Num Puncta		Change in Bound Fraction	Change in STD	Change in Num Puncta
1.2	1.021e-05	6	2	8.168e-06	12		-40	25	-50
2.5	1.265e-05	12	2.9	7.477e-06	19		-13.7931	69.1855	-36.8421
4.2	6.401e-06	26	5.8	5.511e-06	40		-27.5862	16.1495	-35
8.3	9.716e-06	73	7	6.292e-06	33		18.5714	54.4183	121.212
17	6.957e-06	96	16	5.364e-06	192		6.25	29.698	-50
3.4	5.947e-06	26	5.9	8.567e-06	20		-42.3729	-30.5825	30
21	6.362e-06	128	21	5.417e-06	212		0	17.4451	-39.6226
2.8	9.84e-06	18	4	1.123e-05	28		-30	-12.3776	-35.7143
23	4.508e-06	366	31	3.724e-06	554		-25.8065	21.0526	-33.935
						average	-17.193	21.1099	-14.4335
						std	21.3197	30.2926	56.2326
						stderr	7.10657	10.0975	18.7442
						signrank	0.0547	0.0977	0.1563

## Sheet: 1% PFA
After Bound Fraction	After STD	After Num Puncta	Before Bound fraction	Before STD	Before Num Puncta		Change in Bound Fraction	Change in STD	Change in Num Puncta
19	4.916e-06	119	0.035	8.403e-07	14		54185.7	485.029	750
9.8	3.213e-06	193	2	6.624e-07	110		390	385.054	75.4545
9.5	4.146e-06	196	1.3	1.716e-06	45		630.769	141.608	335.556
4.7	4.535e-06	89	0.38	2.449e-06	7		1136.84	85.1776	1171.43
11	5.413e-06	175	0.77	2.039e-06	22		1328.57	165.473	695.455
18	1.933e-06	459	3.6	1.703e-06	73		400	13.5056	528.767
5.5	1.823e-06	203	3.1	1.26e-06	112		77.4194	44.6825	81.25
13	2.673e-06	245	6.8	2.129e-06	98		91.1765	25.5519	150
13	4.488e-06	246	11	2.001e-06	209		18.1818	124.288	17.7033
12	8.604e-06	47	13	6.246e-06	64		-7.69231	37.7522	-26.5625
11	5.292e-06	183	2.9	2.48e-06	46		279.31	113.387	297.826
13	3.105e-06	356	0.5	1.335e-06	17		2500	132.584	1994.12
23	5.719e-06	241	12	2.835e-06	247		91.6667	101.728	-2.42915
6.9	2.906e-06	183	0.83	1.507e-06	22		731.325	92.8334	731.818
6.9	3.271e-06	185	1.2	1.686e-06	31		475	94.0095	496.774
22	5.812e-06	234	16	3.435e-06	256		37.5	69.1994	-8.59375
3.8	2.365e-06	97	3.5	1.511e-06	75		8.57143	56.5189	29.3333
7.8	2.009e-06	306	6.2	1.327e-06	209		25.8065	51.3941	46.4115
17	7.272e-06	78	16	1.538e-06	29		6.25	372.822	168.966
20	2.095e-06	29	14	1.574e-06	26		42.8571	33.1004	11.5385
						average	3122.46	131.285	377.241
						std	12035	130.213	506.771
						stderr	2691.11	29.1166	113.317
						signrank	0.00012042	8.8575e-05	0.00029316

## Sheet: 2% PFA
After Bound Fraction	After STD	After Num Puncta	Before Bound fraction	Before STD	Before Num Puncta		Change in Bound Fraction	Change in STD	Change in Num Puncta
17	9.631e-06	60	1.3	1.809e-06	14		1207.69	432.394	328.571
19	1.192e-05	55	0.92	2.863e-06	9		1965.22	316.346	511.111
14	9.842e-06	52	11	3.211e-06	168		27.2727	206.509	-69.0476
16	9.176e-06	48	13	3.206e-06	210		23.0769	186.213	-77.1429
15	5.99e-06	106	14	2.375e-06	305		7.14286	152.211	-65.2459
11	3.974e-06	215	5.7	1.771e-06	121		92.9825	124.393	77.686
11	8.784e-06	50	12	4.799e-06	114		-8.33333	83.0381	-56.1404
11	2.97e-06	236	1.8	8.83e-07	52		511.111	236.353	353.846
15	7.315e-06	84	12	3.589e-06	188		25	103.817	-55.3191
17	8.147e-06	88	13	4.238e-06	150		30.7692	92.2369	-41.3333
22	1.997e-06	687	3.2	1.258e-06	89		587.5	58.744	671.91
13	2.665e-06	315	4.3	1.564e-06	96		202.326	70.3964	228.125
22	4.45e-06	298	3.9	2.842e-06	60		464.103	56.5799	396.667
13	1.004e-05	32	11	6.94e-06	38		18.1818	44.6686	-15.7895
29	2.951e-06	547	3.5	2.108e-06	47		728.571	39.9905	1063.83
27	4.652e-06	393	4.8	3.429e-06	57		462.5	35.6664	589.474
17	1.871e-06	533	1.8	1.423e-06	69		844.444	31.4828	672.464
18	6.711e-06	180	7.9	4.294e-06	87		127.848	56.2878	106.897
13	6.41e-06	55	13	5.011e-06	60		0	27.9186	-8.33333
6.7	4.995e-06	109	30	3.215e-06	418		-77.6667	55.3655	-73.9234
						average	361.987	120.531	226.915
						std	515.791	107.354	332.692
						stderr	115.334	24.0051	74.3923
						signrank	0.00062487	8.8575e-05	0.0251

## Sheet: 4% PFA
After Bound Fraction	After STD	After Num Puncta	Before Bound fraction	Before STD	Before Num Puncta		Change in Bound Fraction	Change in STD	Change in Num Puncta
24	2.781e-06	533	19	1.508e-06	401		26.3158	84.106	32.9177
7.6	4.114e-06	170	7.7	1.992e-06	127		-1.2987	106.533	33.8583
2.1	2.271e-06	59	1.2	1.131e-06	50		75	100.885	18
17	6.844e-06	135	1.1	1.651e-06	28		1445.45	314.545	382.143
18	7.839e-06	109	13	3.319e-06	213		38.4615	136.145	-48.8263
18	7.375e-06	159	7.2	2.809e-06	152		150	162.633	4.60526
5.8	1.871e-06	273	0.82	1.343e-06	37		607.317	39.5522	637.838
21	2.6e-06	552	17	2.025e-06	304		23.5294	28.0788	81.5789
42	1.516e-06	1903	36	1.107e-06	1210		16.6667	36.9369	57.2727
6.1	4.749e-06	101	1	2.517e-06	10		510	88.4921	910
15	3.803e-06	179	14	2.597e-06	256		7.14286	46.1538	-30.0781
9.9	3.183e-06	289	1.2	1.573e-06	30		725	102.548	863.333
16	4.428e-06	125	18	3.572e-06	162		-11.1111	24.0896	-22.8395
17	4.266e-06	160	15	3.287e-06	201		13.3333	29.7872	-20.398
6.7	9.617e-06	31	6.9	8.112e-06	35		-2.89855	18.619	-11.4286
15	3.169e-06	495	5.2	1.563e-06	176		188.462	103.205	181.25
6.1	6.97e-06	46	7.4	6.545e-06	50		-17.5676	6.41221	-8
11	4.489e-06	104	14	3.784e-06	120		-21.4286	18.7831	-13.3333
9.3	7.202e-06	70	7	5.203e-06	32		32.8571	38.4615	118.75
31	2.316e-05	12	2.7	1.595e-05	7		1048.15	45	71.4286
1.1	2.557e-06	14	0.43	1.112e-06	7		155.814	130.631	100
1.1	9.246e-07	28	0.29	4.773e-07	12		279.31	93.9203	133.333
2.9	1.959e-06	57	0.37	9.945e-07	10		683.784	96.9849	470
0.91	1.09e-06	57	0.032	7.123e-07	1		2743.75	53.0899	5600
1.3	7.082e-07	105	0.014	3.793e-07	1		9185.71	86.8074	10400
2.8	1.262e-06	75	0.19	7.484e-07	7		1373.68	68.4492	971.429
6.6	1.892e-06	206	4.5	1.091e-06	170		46.6667	73.3945	21.1765
11	2.182e-06	305	2.1	6.337e-07	125		423.81	243.849	144
1.1	1.35e-06	38	0.3	5.966e-07	10		266.667	126.131	280
4.1	1.159e-06	127	0.83	5.803e-07	26		393.976	100	388.462
2.7	1.416e-06	46	0.26	8.102e-07	14		938.462	75.3086	228.571
6.4	2.282e-05	7	3.8	1.329e-05	8		68.4211	71.4286	-12.5
0.58	9.452e-07	31	0.21	5.782e-07	6		176.19	63.4948	416.667
4	1.757e-06	101	0.63	9.574e-07	14		534.921	83.908	621.429
						average	650.722	85.246	676.489
						std	1614.21	62.5089	1971.09
						stderr	276.835	10.7202	338.038
						signrank	2.4761e-06	3.6528e-07	2.9138e-05

## Sheet: 8% PFA
After Bound Fraction	After STD	After Num Puncta	Before Bound fraction	Before STD	Before Num Puncta		Change in Bound Fraction	Change in STD	Change in Num Puncta
3.5	4.006e-06	24	0.052	1.31e-06	1		6630.77	205.802	2300
0.63	4.151e-06	3	0.12	2.013e-06	1		425	106.21	200
1	3.672e-06	3	0.078	1.958e-06	1		1182.05	87.5383	200
0.2	2.195e-06	2	0.061	1.292e-06	1		227.869	69.8916	100
0.00072	2.202e-06	1	0.012	1.511e-06	1		-94	45.7313	0
3.5	2.586e-06	30	0.014	1.061e-06	1		24900	143.732	2900
0.26	2.006e-06	3	0.069	8.418e-07	1		276.812	138.299	200
3.9	5.777e-06	10	1.8	3.59e-06	4		116.667	60.9192	150
8.7	4.556e-06	37	0.49	-4.167	4		1675.51	-100	825
0.87	3.442e-06	2	0.28	2.236e-06	1		210.714	53.9356	100
4.4	3.6e-06	24	0.71	1.81e-06	5		519.718	98.895	380
3.7	3.355e-06	30	0.29	2.084e-06	5		1175.86	60.9885	500
6.4	4.709e-06	39	5.3	3.103e-06	34		20.7547	51.7564	14.7059
2.4	2.671e-06	43	5.3	2.5006e-06	52		-54.717	6.81436	-17.3077
7.3	4.903e-06	32	4.3	4.15e-06	20		69.7674	18.1446	60
0.25	2.003e-06	2	0.31	1.312e-06	3		-19.3548	52.6677	-33.3333
3.6	2.451e-06	59	8.8	2.965e-06	72		-59.0909	-17.3356	-18.0556
0.47	2.964e-06	3	0.23	1.794e-06	1		104.348	65.2174	200
0.95	2.68e-06	6	0.1	2.049e-06	1		850	30.7955	500
0.29	2.521e-06	3	0.29	1.555e-06	3		0	62.1222	0
						average	1907.93	62.1062	428.05
						std	5610.85	63.3393	780.301
						stderr	1254.62	14.1631	174.481
						signrank	0.0011	0.0012	0.00084886

## Sheet: 4% PFA + 0.2% GA
After Bound Fraction	After STD	After Num Puncta	Before Bound fraction	Before STD	Before Num Puncta		Change in Bound Fraction	Change in STD	Change in Num Puncta
0.79	1.443e-06	28	0.14	7.489e-07	8		464.286	92.6826	250
0.92	3.544e-06	19	0.13	1.854e-06	1		607.692	91.1543	1800
2.1	3.198e-06	43	0.032	1.629e-06	1		6462.5	96.3168	4200
8.3	1.181e-05	24	11	9.363e-06	33		-24.5455	26.1348	-27.2727
7.2	3.509e-06	71	2	1.097e-06	70		260	219.872	1.42857
12	9.017e-06	36	11	6.712e-06	40		9.09091	34.3415	-10
15	7.84e-06	56	2.6	3.972e-06	19		476.923	97.3817	194.737
7.7	6.538e-06	35	9.2	4.901e-06	38		-16.3043	33.4013	-7.89474
1.6	2.228e-06	34	0.062	1.605e-06	3		2480.65	38.8162	1033.33
2.3	2.763e-06	59	0.099	1.816e-06	1		2223.23	52.1476	5800
11	3.462e-06	92	4	1.8e-06	71		175	92.3333	29.5775
12	1.221e-05	30	6.1	6.652e-06	31		96.7213	83.5538	-3.22581
7.1	1.02e-05	20	7.1	8.402e-05	21		0	-87.86	-4.7619
8.2	1.225e-05	15	7.4	1.03e-05	15		10.8108	18.932	0
7.4	1.427e-05	18	12	1.37e-05	25		-38.3333	4.16058	-28
16	8.848e-06	56	9.7	6.493e-06	48		64.9485	36.2698	16.6667
1.7	6.18e-06	13	0.65	3.826e-06	6		161.538	61.5264	116.667
11	6.231e-06	51	9.7	5.3e-06	53		13.4021	17.566	-3.77358
2.6	2.122e-06	92	0.5	1.261e-06	18		420	68.2791	411.111
1.9	3.078e-06	49	1.8	1.862e-06	42		5.55556	65.3061	16.6667
						average	692.658	57.1158	689.263
						std	1528.57	57.9933	1562.26
						stderr	341.799	12.9677	349.331
						signrank	0.0019	0.00068061	0.0242
