# Supplementary material for: Fixation can change the appearance of phase separation in living cells
Source: eLife. 2022 Nov 29;11:e79903. doi: 10.7554/eLife.79903 (PMC9817179; doi:10.7554/eLife.79903)
Supplement: Figure 1—source data 1. [file elife-79903-fig1-data1.xlsx]

## Sheet: EGFP - EWS(IDR)
After Bound Fraction	After STD	After Num Puncta	Before Bound fraction	Before STD	Before Num Puncta		Change in Bound Fraction	Change in STD	Change in Num Puncta
24	2.781e-06	533	19	1.508e-06	401		0.263158	0.84106	0.329177
7.6	4.114e-06	170	7.7	1.992e-06	127		-0.012987	1.06533	0.338583
2.1	2.271e-06	59	1.2	1.131e-06	50		0.75	1.00885	0.18
17	6.844e-06	135	1.1	1.651e-06	28		14.4545	3.14545	3.82143
18	7.839e-06	109	13	3.319e-06	213		0.384615	1.36145	-0.488263
18	7.375e-06	159	7.2	2.809e-06	152		1.5	1.62633	0.0460526
5.8	1.871e-06	273	0.82	1.343e-06	37		6.07317	0.395522	6.37838
21	2.6e-06	552	17	2.025e-06	304		0.235294	0.280788	0.815789
42	1.516e-06	1903	36	1.107e-06	1210		0.166667	0.369369	0.572727
6.1	4.749e-06	101	1	2.517e-06	10		5.1	0.884921	9.1
15	3.803e-06	179	14	2.597e-06	256		0.0714286	0.461538	-0.300781
9.9	3.183e-06	289	1.2	1.573e-06	30		7.25	1.02548	8.63333
16	4.428e-06	125	18	3.572e-06	162		-0.111111	0.240896	-0.228395
17	4.266e-06	160	15	3.287e-06	201		0.133333	0.297872	-0.20398
6.7	9.617e-06	31	6.9	8.112e-06	35		-0.0289855	0.18619	-0.114286
15	3.169e-06	495	5.2	1.563e-06	176		1.88462	1.03205	1.8125
6.1	6.97e-06	46	7.4	6.545e-06	50		-0.175676	0.0641221	-0.08
11	4.489e-06	104	14	3.784e-06	120		-0.214286	0.187831	-0.133333
9.3	7.202e-06	70	7	5.203e-06	32		0.328571	0.384615	1.1875
31	2.316e-05	12	2.7	1.595e-05	7		10.4815	0.45	0.714286
1.1	2.557e-06	14	0.43	1.112e-06	7		1.55814	1.30631	1
1.1	9.246e-07	28	0.29	4.773e-07	12		2.7931	0.939203	1.33333
2.9	1.959e-06	57	0.37	9.945e-07	10		6.83784	0.969849	4.7
0.91	1.09e-06	57	0.032	7.123e-07	1		27.4375	0.530899	56
1.3	7.082e-07	105	0.014	3.793e-07	1		91.8571	0.868074	104
2.8	1.262e-06	75	0.19	7.484e-07	7		13.7368	0.684492	9.71429
6.6	1.892e-06	206	4.5	1.091e-06	170		0.466667	0.733945	0.211765
11	2.182e-06	305	2.1	6.337e-07	125		4.2381	2.43849	1.44
1.1	1.35e-06	38	0.3	5.966e-07	10		2.66667	1.26131	2.8
4.1	1.159e-06	127	0.83	5.803e-07	26		3.93976	1	3.88462
2.7	1.416e-06	46	0.26	8.102e-07	14		9.38462	0.753086	2.28571
6.4	2.282e-05	7	3.8	1.329e-05	8		0.684211	0.714286	-0.125
0.58	9.452e-07	31	0.21	5.782e-07	6		1.7619	0.634948	4.16667
4	1.757e-06	101	0.63	9.574e-07	14		5.34921	0.83908	6.21429
						average	6.54231	0.852865	6.78158
						std	16.3911	0.634777	20.0162
						stderr	2.85332	0.1105	3.48438
						signrank	2.4761e-06	3.6528e-07	2.9138e-05

## Sheet: EGFP - FUS(IDR)
After Bound Fraction	After STD	After Num Puncta	Before Bound fraction	Before STD	Before Num Puncta		Change in Bound Fraction	Change in STD	Change in Num Puncta
2.1	1.914e-05	23	1	1.125e-06	16		1.1	16.0133	0.4375
7	1.172e-06	572	0.92	3.913e-07	121		6.6087	1.99514	3.72727
2.3	5.707e-07	128	0.68	3.225e-07	47		2.38235	0.769612	1.7234
8.9	2.98e-06	204	3.6	1.108e-06	126		1.47222	1.68953	0.619048
6.2	2.46e-06	212	1.6	7.118e-07	80		2.875	2.45603	1.65
4.7	9.609e-07	180	1.4	4.421e-07	83		2.35714	1.17349	1.16867
1.3	1.194e-06	79	0.37	7.476e-07	23		2.51351	0.597111	2.43478
6.3	9.823e-07	368	1.1	3.915e-07	66		4.72727	1.50907	4.57576
5.9	7.376e-07	307	0.8	4.177e-07	48		6.375	0.765861	5.39583
5.7	9.038e-07	208	1.3	4.369e-07	69		3.38462	1.06867	2.01449
3.4	1.08e-06	100	0.97	6.589e-07	29		2.50515	0.639095	2.44828
9.1	1.619e-06	391	3.4	7.03e-07	290		1.67647	1.30299	0.348276
9.1	1.619e-06	391	3.4	7.03e-07	290		1.67647	1.30299	0.348276
3	1.061e-06	101	0.17	5.171e-07	6		16.6471	1.05183	15.8333
6.6	1.394e-06	170	1.6	6.861e-07	35		3.125	1.03177	3.85714
5.1	1.078e-06	302	0.46	5.334e-07	30		10.087	1.021	9.06667
8.4	3.873e-06	178	3.4	2.009e-06	92		1.47059	0.927825	0.934783
						average	4.1755	2.07737	3.32844
						std	3.98133	3.62406	3.93793
						stderr	0.965614	0.878963	0.955088
						signrank	0.000292	0.000295	0.000202

## Sheet: EGFP - TAF15(IDR)
After Bound Fraction	After STD	After Num Puncta	Before Bound fraction	Before STD	Before Num Puncta		Change in Bound Fraction	Change in STD	Change in Num Puncta
5.7	6.208e-06	37	4.9	3.875e-06	27		0.163265	0.602065	0.37037
3.4	3.583e-06	38	2.3	1.505e-06	35		0.478261	1.38073	0.0857143
2	1.723e-06	71	1.3	1.153e-06	49		0.538462	0.494363	0.44898
1.2	8.626e-07	66	0.48	5.665e-07	29		1.5	0.522683	1.27586
3	1.674e-06	96	0.88	6.477e-07	42		2.40909	1.58453	1.28571
4.4	2.249e-06	35	3.4	1.355e-06	38		0.294118	0.659779	-0.0789474
5.5	2.395e-06	42	1.9	1.424e-06	20		1.89474	0.681882	1.1
5.3	1.906e-06	115	1.6	5.664e-07	90		2.3125	2.36511	0.277778
5.3	1.906e-06	115	1.6	5.664e-07	90		2.3125	2.36511	0.277778
6.9	9.032e-06	60	5.9	6.038e-06	39		0.169492	0.49586	0.538462
5.9	1.814e-06	192	3.8	9.274e-07	145		0.552632	0.956006	0.324138
6.2	1.941e-06	149	2.6	1.081e-06	75		1.38462	0.79556	0.986667
7	3.543e-06	124	3.4	1.464e-06	80		1.05882	1.42008	0.55
8.2	4.716e-06	136	3.9	2.825e-06	76		1.10256	0.669381	0.789474
5.6	3.256e-06	73	3.6	1.908e-06	53		0.555556	0.706499	0.377358
2.6	1.053e-06	75	0.9	7.558e-07	25		1.88889	0.393226	2
1.8	1.422e-06	59	2.6	9.099e-07	88		-0.307692	0.562809	-0.329545
1.8	1.422e-06	59	2.6	9.099e-07	88		-0.307692	0.562809	-0.329545
6	6.15e-06	40	5.7	5.024e-06	24		0.0526316	0.224124	0.666667
2.9	1.828e-06	37	1.8	1.056e-06	32		0.611111	0.731061	0.15625
3.4	2.908e-06	41	3.2	3.111e-06	28		0.0625	-0.0652523	0.464286
1.7	3.166e-06	16	0.71	2.229e-06	8		1.39437	0.420368	1
3.8	1.249e-06	77	4.9	1.192e-06	77		-0.22449	0.0478188	0
5.9	3.229e-06	67	4.6	2.928e-06	55		0.282609	0.102801	0.218182
						average	0.840785	0.778309	0.518985
						std	0.86259	0.63142	0.548483
						stderr	0.176075	0.128888	0.111959
						signrank	0.0002547	2.347e-05	0.00026202
