# Supplementary material for: Fixation can change the appearance of phase separation in living cells
Source: eLife. 2022 Nov 29;11:e79903. doi: 10.7554/eLife.79903 (PMC9817179; doi:10.7554/eLife.79903)
Supplement: Figure 2—source data 1. [file elife-79903-fig2-data1.xlsx]

## Sheet: DsRed - TAF15(IDR)
After Bound Fraction	After STD	After Num Puncta	Before Bound fraction	Before STD	Before Num Puncta		Change in Bound Fraction	Change in STD	Change in Num Puncta
26	2.961e-05	117	20	3.063e-05	46		0.3	-0.0333007	1.54348
30	3.221e-05	145	16	3.023e-05	123		0.875	0.0654978	0.178862
28	2.965e-05	100	21	2.714e-05	54		0.333333	0.0924834	0.851852
36	2.865e-05	127	21	2.475e-05	113		0.714286	0.157576	0.123894
41	3.7e-05	83	27	3.27e-05	21		0.518519	0.131498	2.95238
42	1.955e-05	213	30	1.585e-05	42		0.4	0.233438	4.07143
29	2.023e-05	48	19	1.81e-05	36		0.526316	0.11768	0.333333
24	1.61e-05	44	19	1.578e-05	33		0.263158	0.0202788	0.333333
41	3.257e-05	72	35	2.862e-05	55		0.171429	0.138015	0.309091
35	2.363e-05	187	24	2.021e-05	20		0.458333	0.169223	8.35
37	3.604e-05	57	31	3.177e-05	23		0.193548	0.134404	1.47826
35	1.632e-05	267	8.2	1.387e-05	20		3.26829	0.17664	12.35
42	4.238e-05	32	31	3.968e-05	13		0.354839	0.0680444	1.46154
15	1.881e-05	188	10	1.537e-05	16		0.5	0.223813	10.75
35	1.878e-05	49	30	1.539e-05	48		0.166667	0.220273	0.0208333
38	3.858e-05	24	33	3.431e-05	21		0.151515	0.124454	0.142857
35	2.117e-05	51	22	1.771e-05	28		0.590909	0.19537	0.821429
14	2.32e-05	35	11	2.04e-05	6		0.272727	0.137255	4.83333
39	2.956e-05	41	32	2.641	37		0.21875	-0.999989	0.108108
49	1.175e-05	546	9.8	1.014e-05	25		4	0.158777	20.84
28	1.747e-05	197	17	1.278e-05	26		0.647059	0.36698	6.57692
36	1.665e-05	296	15	1.252e-05	24		1.4	0.329872	11.3333
19	6.75e-06	209	4	4.933e-06	8		3.75	0.368336	25.125
						average	0.872812	0.112896	4.99519
						std	1.14869	0.261874	6.93588
						stderr	0.239517	0.0546045	1.44623
						signrank	2.7016e-05	0.00058844	2.6987e-05

## Sheet: EGFP - TAF15(IDR)
After Bound Fraction	After STD	After Num Puncta	Before Bound fraction	Before STD	Before Num Puncta		Change in Bound Fraction	Change in STD	Change in Num Puncta
5.7	6.208e-06	37	4.9	3.875e-06	27		0.163265	0.602065	0.37037
3.4	3.583e-06	38	2.3	1.505e-06	35		0.478261	1.38073	0.0857143
2	1.723e-06	71	1.3	1.153e-06	49		0.538462	0.494363	0.44898
1.2	8.626e-07	66	0.48	5.665e-07	29		1.5	0.522683	1.27586
3	1.674e-06	96	0.88	6.477e-07	42		2.40909	1.58453	1.28571
4.4	2.249e-06	35	3.4	1.355e-06	38		0.294118	0.659779	-0.0789474
5.5	2.395e-06	42	1.9	1.424e-06	20		1.89474	0.681882	1.1
5.3	1.906e-06	115	1.6	5.664e-07	90		2.3125	2.36511	0.277778
5.3	1.906e-06	115	1.6	5.664e-07	90		2.3125	2.36511	0.277778
6.9	9.032e-06	60	5.9	6.038e-06	39		0.169492	0.49586	0.538462
5.9	1.814e-06	192	3.8	9.274e-07	145		0.552632	0.956006	0.324138
6.2	1.941e-06	149	2.6	1.081e-06	75		1.38462	0.79556	0.986667
7	3.543e-06	124	3.4	1.464e-06	80		1.05882	1.42008	0.55
8.2	4.716e-06	136	3.9	2.825e-06	76		1.10256	0.669381	0.789474
5.6	3.256e-06	73	3.6	1.908e-06	53		0.555556	0.706499	0.377358
2.6	1.053e-06	75	0.9	7.558e-07	25		1.88889	0.393226	2
1.8	1.422e-06	59	2.6	9.099e-07	88		-0.307692	0.562809	-0.329545
1.8	1.422e-06	59	2.6	9.099e-07	88		-0.307692	0.562809	-0.329545
6	6.15e-06	40	5.7	5.024e-06	24		0.0526316	0.224124	0.666667
2.9	1.828e-06	37	1.8	1.056e-06	32		0.611111	0.731061	0.15625
3.4	2.908e-06	41	3.2	3.111e-06	28		0.0625	-0.0652523	0.464286
1.7	3.166e-06	16	0.71	2.229e-06	8		1.39437	0.420368	1
3.8	1.249e-06	77	4.9	1.192e-06	77		-0.22449	0.0478188	0
5.9	3.229e-06	67	4.6	2.928e-06	55		0.282609	0.102801	0.218182
						average	0.840785	0.778309	0.518985
						std	0.86259	0.63142	0.548483
						stderr	0.176075	0.128888	0.111959
						signrank	0.0002547	2.347e-05	0.00026202

## Sheet: Halo - TAF15(IDR)
After Bound Fraction	After STD	After Num Puncta	Before Bound fraction	Before STD	Before Num Puncta		Change in Bound Fraction	Change in STD	Change in Num Puncta
0.82	8.89e-06	6	3.7	1.85e-05	12		-0.778378	-0.519459	-0.5
0.32	1.049e-05	4	2.2	1.971e-05	14		-0.854545	-0.467783	-0.714286
4.2	4.667e-05	7	7.1	5.464e-05	18		-0.408451	-0.145864	-0.611111
7.2	3.424e-05	15	10	4.985e-05	20		-0.28	-0.313139	-0.25
0.13	6.113e-06	2	0.63	8.248e-06	6		-0.793651	-0.258851	-0.666667
1.4	2.743e-05	2	2.3	2.82e-05	14		-0.391304	-0.027305	-0.857143
0.038	6.494e-06	4	0.36	1.336e-05	24		-0.894444	-0.513922	-0.833333
0.038	6.494e-06	4	0.36	1.336e-05	24		-0.894444	-0.513922	-0.833333
0.28	1.521e-05	2	0.31	1.63e-05	3		-0.0967742	-0.0668712	-0.333333
0.63	5.223e-06	10	1.1	6.987e-06	17		-0.427273	-0.252469	-0.411765
			2.806
						average	-0.581927	-0.307959	-0.601097
						std	0.292491	0.189678	0.219006
						stderr	0.0924937	0.0599815	0.0692557
						signrank	0.002	0.002	0.002
