# Supplementary material for: Fixation can change the appearance of phase separation in living cells
Source: eLife. 2022 Nov 29;11:e79903. doi: 10.7554/eLife.79903 (PMC9817179; doi:10.7554/eLife.79903)
Supplement: Figure 3—source data 1. [file elife-79903-fig3-data1.xlsx]

## Sheet: EGFP - FUS(FL)
After Bound Fraction	After STD	After Num Puncta	Before Bound fraction	Before STD	Before Num Puncta		Change in Bound Fraction	Change in STD	Change in Num Puncta
7.6	1.266e-06	667	10	1.544e-06	910		-0.24	-0.180052	-0.267033
12	3.815e-06	212	18	3.718e-06	459		-0.333333	0.0260893	-0.538126
13	5.244e-06	247	9.6	4.692e-06	196		0.354167	0.117647	0.260204
14	8.675e-06	192	17	6.784e-06	245		-0.176471	0.278744	-0.216327
17	5.614e-06	219	18	5.26e-06	246		-0.0555556	0.0673004	-0.109756
12	6.07e-06	197	10	5.306e-06	181		0.2	0.143988	0.0883978
14	4.318e-06	338	10	6.251e-06	200		0.4	-0.309231	0.69
17	6.819e-06	304	17	6.403e-06	270		0	0.0649695	0.125926
15	2.995e-06	492	16	2.709e-06	504		-0.0625	0.105574	-0.0238095
5.2	6.945e-06	98	6.4	7.209e-06	147		-0.1875	-0.0366209	-0.333333
15	3.852e-06	445	8.9	4.249e-06	249		0.685393	-0.0934337	0.787149
9.1	8.638e-06	136	7.7	8.68e-06	88		0.181818	-0.00483871	0.545455
18	6.035e-06	355	11	6.583e-06	189		0.636364	-0.0832447	0.878307
4.4	6.054e-06	77	9.5	5.864e-06	197		-0.536842	0.0324011	-0.609137
11	5.848e-06	222	6.2	5.386e-06	114		0.774194	0.0857779	0.947368
8.1	7.239e-06	133	11	6.987e-06	165		-0.263636	0.036067	-0.193939
9.9	6.371e-06	180	11	5.998e-06	192		-0.1	0.0621874	-0.0625
15	5.827e-06	310	10	5.698e-06	192		0.5	0.0226395	0.614583
16	3.883e-06	481	13	3.658e-06	339		0.230769	0.061509	0.418879
16	5.262e-06	393	13	5.003e-06	248		0.230769	0.0517689	0.584677
12	5.5722e-06	248	6.8	5.213e-06	132		0.764706	0.0689047	0.878788
						average	0.142969	0.0246737	0.212656
						stderr	0.0838698	0.0262964	0.107073
						signrank	0.1353	0.159	0.0853

## Sheet: EWS-FLI1
After Bound Fraction	After STD	After Num Puncta	Before Bound fraction	Before STD	Before Num Puncta		Change in Bound Fraction	Change in STD	Change in Num Puncta
5.4	1.25e-05	40	2.6	7.52e-06	26		1.08	0.659	0.538462
4.7	1.64e-05	21	6.1	1.05e-05	35		-0.23	0.56	-0.4
7.3	7.74e-06	91	3.5	5.78e-06	50		1.09	0.339	0.82
8.1	6.19e-06	116	2.5	4.88e-06	43		2.24	0.27	1.69767
4.4	8.91e-06	45	3	5.26e-06	52		0.467	0.694	-0.134615
6.1	8e-06	66	3.4	4.26e-06	58		0.794	0.876	0.137931
5.4	9.46e-06	43	4.1	5.08e-05	57		0.317	-0.814	-0.245614
4.3	2.05e-05	35	3.9	7.54e-05	38		0.103	-0.728	-0.0789474
4.4	1.43e-05	27	4.6	1.06e-05	31		-0.0435	0.344	-0.129032
3.3	1.68e-05	24	3.5	9.54e-06	21		-0.0571	0.76	0.142857
0.51	6.66e-06	30	1.3	8.3e-06	21		-0.608	-0.198	0.428571
1.5	9.58e-06	37	1.3	5.98e-06	24		0.154	0.604	0.541667
2.3	8.37e-06	74	1.2	9.84e-06	13		0.917	-0.149	4.69231
0.56	9.18e-06	15	1.7	1.22e-05	20		-0.671	-0.247	-0.25
0.58	4.66e-06	25	1.3	7.06e-06	23		-0.554	-0.34	0.0869565
						average	0.333	0.175	0.523214
						std	0.788408	0.548553	1.27065
						stderr	0.204	0.142	0.328081
						signrank	0.169	0.229	0.121

## Sheet: TAF15(IDR) - FTH1
After Bound Fraction	After STD	After Num Puncta	Before Bound fraction	Before STD	Before Num Puncta		Change in Bound Fraction	Change in STD	Change in Num Puncta
29	5.873e-05	34	24	5.636e-05	28		0.208333	0.0420511	0.214286
19	7.445e-05	44	30	7.739e-05	52		-0.366667	-0.0379894	-0.153846
11	8.862e-06	39	14	9.946e-06	52		-0.214286	-0.108989	-0.25
2.6	5.335e-05	62	2.7	2.237e-05	41		-0.037037	1.38489	0.512195
12	6.59e-05	107	19	2.926e-05	106		-0.368421	1.25222	0.00943396
6.2	6.86e-06	13	3.1	5.866e-06	29		1	0.169451	-0.551724
2.7	6.329e-06	21	3.1	1.152e-05	21		-0.129032	-0.450608	0
5.6	6.705e-06	13	6.2	6.86e-06	13		-0.0967742	-0.0225948	0
3.1	5.866e-06	28	2.7	6.329e-06	21		0.148148	-0.0731553	0.333333
3.1	1.152e-05	21	3.1	1.21e-05	20		0	-0.0479339	0.05
6.6	3.088e-05	151	4.6	3.168e-05	110		0.434783	-0.0252525	0.372727
20	6.131e-05	78	22	6.761e-05	78		-0.0909091	-0.0931815	0
6.4	8.358e-06	29	8.6	9.675e-06	30		-0.255814	-0.136124	-0.0333333
6	6.242e-06	112	4.5	5.667e-06	104		0.333333	0.101465	0.0769231
7.2	6.128e-06	140	7.8	7.029e-06	131		-0.0769231	-0.128183	0.0687023
4.8	7.85e-06	25	3.1	7.85e-06	26		0.548387	0	-0.0384615
			9.90625
						average	0.0552525	0.118934	0.0263967
						std	0.377977	0.505796	0.254715
						stderr	0.0975933	0.130596	0.065767
						signrank	0.804	0.7197	0.4548
