# Supplementary material for: Fixation can change the appearance of phase separation in living cells
Source: eLife. 2022 Nov 29;11:e79903. doi: 10.7554/eLife.79903 (PMC9817179; doi:10.7554/eLife.79903)
Supplement: Figure 6—source data 1. [file elife-79903-fig6-data1.xlsx]

## Sheet: processed_data
U2OS	pHalo-TAF15	TAF15-pHalo-FTH1
1	20.8587	54.0668
2	5.45763	35.651
3	4.69073	25.984
4	14.5031	34.9215
5	7.83736	197.461
6	8.43268	86.7344
7	14.9506	59.8706
8	16.6224	193.588
9	13.0509	59.8353
10	11.9072	13.8222
11	12.7652	13.5657
12	11.0418	41.3275
13	9.98355	22.476
14	10.6307	79.255
15	6.97204	49.2035
16	4.91899	41.5511
17	3.97328	117.332
18	6.37061	82.9259
19	16.5337	47.6131
20	3.06851	25.7244
Mean residence time	10.2285	64.1454
SEM	1.09875	11.6461
Mann-Whitney U test p-value
2.017e-09
